# Supplementary material for: MicroRNA-16 Restores Sensitivity to Tyrosine Kinase Inhibitors and Outperforms MEK Inhibitors in KRAS-Mutated Non-Small Cell Lung Cancer
Source: MDPI journal article supplement (doi:10.3390/ijms222413357), 2021-12-12
Supplement: s1 [file s1]

## SUPPLEMENTARY TABLES

**Table S1 KRAS mutation status in the lung adenocarcinoma cell lines used in this study.**

| Cell line | Mutation type | Nucleotide substitution | Amino acid substitution |
|-----------|---------------|-------------------------|-------------------------|
| A549      | Transition    | GGT > AGT; G34A         | G12S                    |
| NCI-H2009 | Transversion  | GGT > GCT; G35C         | G12A                    |

**Table S2 Histological and KRAS status of NSCLC patients used in this study.**

|    | SAMPLE | HISTOLOGY                             | KRAS STATUS | KRAS MUTATION |
|----|--------|---------------------------------------|-------------|---------------|
| 1  | L4T    | Carcinoid                             | wt          |               |
| 2  | L5T    | Squamous                              | wt          |               |
| 3  | L9T    | Squamous                              | wt          |               |
| 4  | L10T   | Squamous                              | wt          |               |
| 5  | L11T   | Squamous                              | wt          |               |
| 6  | L12T   | Bronchoalveolar Adenocarcinomarcinoma | wt          |               |
| 7  | L13T   | Bronchoalveolar Adenocarcinomarcinoma | wt          |               |
| 8  | L18T   | Carcinoid                             | wt          |               |
| 9  | L19T   | Adenocarcinomarcinoma                 | mut         | G34T [G12C]   |
| 10 | L20T   | Squamous                              | wt          |               |
| 11 | L22T   | Squamous                              | wt          |               |
| 12 | L29T   | Squamous                              | wt          |               |
| 13 | L30T   | Adenocarcinomarcinoma                 | mut         | G35A [G12D]   |
| 14 | L32T   | Squamous                              | wt          |               |
| 15 | L35T   | Squamous                              | wt          |               |
| 16 | L40T   | Adenocarcinomarcinoma                 | wt          |               |
| 17 | L42T   | Squamous                              | wt          |               |
| 18 | L45T   | Adenosquamous                         | wt          |               |
| 19 | L46T   | Squamous                              | wt          |               |
| 20 | L47T   | Bronchoalveolar Adenocarcinomarcinoma | wt          |               |
| 21 | L48T   | Bronchoalveolar Adenocarcinomarcinoma | wt          |               |
| 22 | L50T   | Adenocarcinomarcinoma                 | wt          |               |
| 23 | L53T   | Squamous                              | wt          |               |
| 24 | L54T   | Squamous                              | wt          |               |
| 25 | L57T   | Squamous                              | mut         | G35A [G12D]   |
| 26 | L60T   | Squamous                              | wt          |               |
| 27 | L61T   | Adenocarcinomarcinoma                 | mut         | G37T [G13C]   |
| 28 | L62T   | Adenocarcinomarcinoma                 | mut         | G35T [G12V]   |
| 29 | L63T   | Squamous                              | wt          |               |
| 30 | L64T   | Adenocarcinomarcinoma                 | mut         | G35T [G12V]   |
| 31 | L65T   | Adenocarcinomarcinoma                 | wt          |               |
| 32 | L66T   | Adenocarcinomarcinoma                 | mut         | G34T [G12C]   |
| 33 | L67T   | Squamous                              | wt          |               |
| 34 | L70T   | Adenocarcinomarcinoma                 | mut         | G35A [G12D]   |
| 35 | L73T   | Adenocarcinomarcinoma                 | wt          |               |
| 36 | L74T   | Adenocarcinomarcinoma                 | wt          |               |
| 37 | L76T   | Adenocarcinomarcinoma                 | mut         | G34T [G12C]   |
| 38 | L77T   | Squamous                              | wt          |               |
| 39 | L78T   | Adenocarcinomarcinoma                 | mut         | G35A [G12D]   |
| 40 | L82T   | Adenocarcinomarcinoma +               | wt          |               |
| 41 | L83T   | Adenocarcinomarcinoma not confirmed   | wt          |               |
| 42 | L84T   | Adenocarcinomarcinoma                 | mut         | G34T [G12C]   |
| 43 | L86T   | Squamous                              | wt          |               |
| 44 | L87T   | Adenocarcinomarcinoma                 | mut         | G34T [G12C]   |
| 45 | L89T   | Adenocarcinomarcinoma                 | wt          |               |
| 46 | L90T   | Adenocarcinomarcinoma                 | wt          |               |
| 47 | L91T   | Adenocarcinomarcinoma                 | mut         | G34T [G12C]   |
| 48 | L92T   | Adenocarcinomarcinoma                 | wt          |               |
| 49 | L93T   | Carcinoid                             | wt          |               |

|    |              |                                  |            |                    |
|----|--------------|----------------------------------|------------|--------------------|
| 50 | L94T         | Adenocarcinoma                   | wt         |                    |
| 51 | L95T         | carcinoide                       | wt         |                    |
| 52 | L96T         | Squamous                         | wt         |                    |
| 53 | <i>L99T</i>  | <i>Adenocarcinoma</i>            | <i>mut</i> | <i>G34T [G12C]</i> |
| 54 | L100T        | Adenocarcinoma                   | wt         |                    |
| 55 | <i>L101T</i> | <i>Bronchoalveolar Carcinoid</i> | <i>mut</i> | <i>G35T [G12V]</i> |
| 56 | L102T        | Carcinoid                        | wt         |                    |
| 57 | L103T        | Large cells                      | wt         |                    |
| 58 | L104T        | Adenocarcinoma                   | wt         |                    |
| 59 | L105T        | Adenocarcinoma                   | wt         |                    |
| 60 | <i>L106T</i> | <i>Adenocarcinoma</i>            | <i>mut</i> | <i>G34A [G12S]</i> |
| 61 | <i>L107T</i> | <i>Adenocarcinoma</i>            | <i>mut</i> | <i>G35T [G12V]</i> |
| 62 | L109T        | Adenocarcinoma                   | wt         |                    |
| 63 | L110T        | Adenocarcinoma                   | wt         |                    |
| 64 | L111T        | Adenocarcinoma                   | wt         |                    |
| 65 | L112T        | Squamous                         | wt         |                    |
| 66 | L113T        | Adenocarcinoma                   | wt         |                    |
| 67 | L114T        | Adenocarcinoma                   | wt         |                    |
| 68 | L117T        | Adenocarcinoma                   | wt         |                    |
| 69 | <i>L118T</i> | <i>Large cells</i>               | <i>mut</i> | <i>G34T [G12C]</i> |
| 70 | L120T        | Squamous                         | wt         |                    |
| 71 | L121T        | Squamous                         | wt         |                    |
| 72 | L122T        | Adenocarcinoma                   | wt         |                    |
| 73 | L123T        | Squamous                         | wt         |                    |
| 74 | L124T        | Squamous                         | wt         |                    |
| 75 | L125T        | Squamous                         | wt         |                    |
| 76 | L127T        | Adenocarcinoma                   | wt         |                    |
| 77 | L129T        | Adenocarcinoma                   | wt         |                    |
| 78 | L130T        | Neuroendocrine Tumor             | wt         |                    |
| 79 | L131T        | Adenocarcinoma                   | wt         |                    |
| 80 | L133T        | Adenocarcinoma                   | wt         |                    |
| 81 | L134T        | Adenocarcinoma                   | wt         |                    |
| 82 | L136T        | Adenocarcinoma                   | wt         |                    |
| 83 | L137T        | Squamous                         | wt         |                    |
| 84 | L138T        | Squamous                         | wt         |                    |
| 85 | L139T        | Adenocarcinoma                   | wt         |                    |
| 86 | L140T        | Adenocarcinoma                   | wt         |                    |
| 87 | L141T        | Epidermoid                       | wt         |                    |
| 88 | <i>L142T</i> | <i>Adenocarcinoma</i>            | <i>mut</i> | <i>G38A [G13D]</i> |
| 89 | L143T        | Squamous                         | wt         |                    |
| 90 | L144T        | NA                               | wt         |                    |
| 91 | L145T        | Adenocarcinoma                   | wt         |                    |
| 92 | L146T        | Adenocarcinoma                   | wt         |                    |

---

**Table S3 List of primers used in this study.** List of the primers used for PCR, sequencing, plasmid cloning, and plasmid mutagenesis. Underlined sequences indicate the endonuclease restriction site.

| Procedure                         | Primer Name                    | Froward Primer                                | Reverse Primer                                |
|-----------------------------------|--------------------------------|-----------------------------------------------|-----------------------------------------------|
| <i>PCR<br/>and<br/>Sequencing</i> | k-ras exon 2                   | GGTGAGTTTGTATTAAAAGGTACTGG                    | GGTCCTGCACCAGTAATATGC                         |
|                                   | 189bp 12_13 KRAS               | TCATTATTTTTATTATAAGGCCTGCTGAA                 | CAAAGACTGGTCCTGCACCAGTA                       |
|                                   | 92bp 12_13 KRAS                | TTATAAGGCCTGCTGAAAATGACTGAA                   | TGAATTAGCTGTATCGTCAAGGCACT                    |
|                                   | SEQ MAP2K1 15a_16              | GGTGAATGTGGGTAGTCATTC                         | GTATCCACACAGTATACTG                           |
|                                   | SEQ MAP2K1 15a_16<br>(Primer3) | GTGGGTAGTCATTCTTACAA                          |                                               |
|                                   | pGL3 universal                 |                                               | CACTGCATTTAGTTGTGG                            |
|                                   | SEQ MAP2K1 16 (II)             | AGAACACAGCATGTGCCAAG                          | TCTCACAAGGCTCCCTCCTA                          |
|                                   | SEQ MAPK3 15a_16               | GTTAGAAAATGGACACTGTGC                         | GGATGCTAGCCCTTGAGACT                          |
|                                   | SEQ MAPK3 15a_16 (II)          | GCTACACGCAGTTGCAGTACATCG                      | GATGATACAATTCAGGTCTCTCTG                      |
| <i>Cloning</i>                    | SEQ c-RAF 15a_16               | AGTTGACTTTGCACCTGTCT                          | GCCTTGAGCATGGGGAATGT                          |
|                                   | MAP2K1 3'UTR                   | GCTCTAGAGCTAGCCTTAACCAGCCCAG                  | GCGGCCGGCCCTCGAGTGAAAAGCTTACCA                |
|                                   | MAPK3 3'UTR                    | GCTCTAGACCTCTTCTGCCTGCTTCTCT                  | GCGGCCGGCCCTCGAGGATATCCCTAGGAA                |
|                                   | CRAF 3'UTR                     | GCTCTAGAGCTAGCCCCACACTGAGGAT                  | GCGGCCGGCCCTCGAGTTAAAAGGAGGTAA                |
| <i>Mutagenesis</i>                | MAP2K1 15a_16                  | GGCAGTGATGTGAAGCATGCTTTGAAAATGAGC             | GCTCATTTTCAAAGCATGCTTCACATGCACTGCC            |
|                                   | MAP2K1 16 (II)                 | GGATTGGCTTTGTGCTTGGGGCGATGATCAAAACCTGT<br>GCC | GGCACAGGTTTTGATCATCGCCCCAAGCACAAAGCC<br>AATCC |
|                                   | MAPK3 15a_16                   | CCAGTTCAATCTCCCGCGCGCCCTTACCTTCC              | GGAAGGTAAGGGCGCGCGGAGATTGAACTGG               |
|                                   | MAPK3 15a_16 (II)              | CCTCAAGTACATCCACTCCGAGATCTAAAGCCC             | GGGCTTTAGATCTCGGAGTGGATGTACTTGAGG             |
|                                   | c-RAF 15a_16                   | CATGTTTTTCAGAGAAGCAGGACCTTCTAGACTGC           | GCAGTCTAGAAGGTCCTGCTTCTCTGAAAACATG            |

**SUPPLEMENTARY FIGURES**

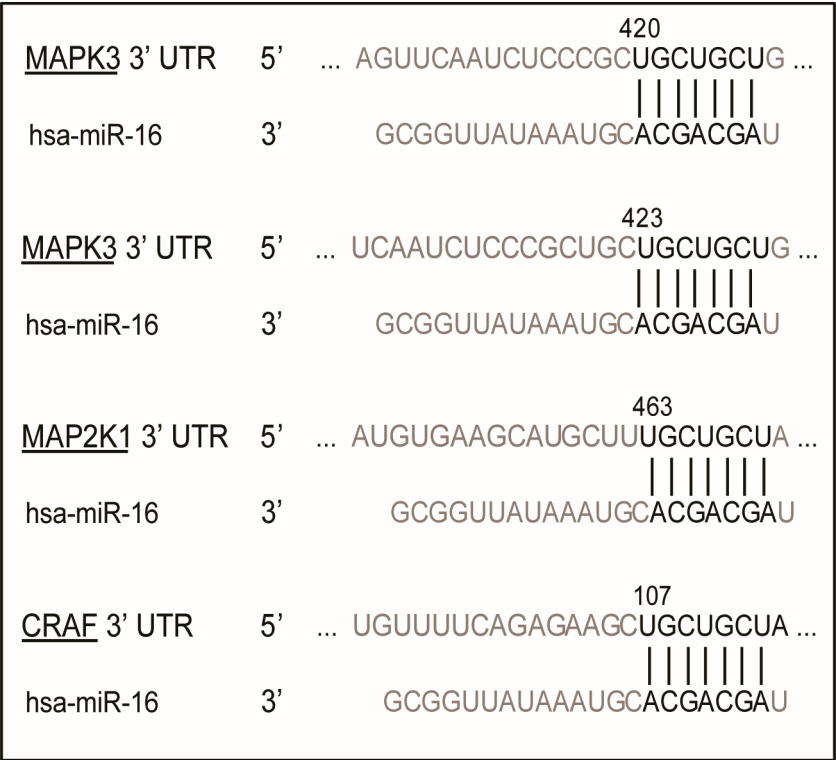

**Figure S1 Predicted pairing of *MAPK3*, *MAP2K1*, and *CRAF* 3'UTR region and miR-16.** Schematic representation of the predicted miR-16 target sites in the *MAPK3*, *MAP2K1*, and *CRAF* 3'UTR mRNA, according to the Software TargetScanHuman Release v6.2.

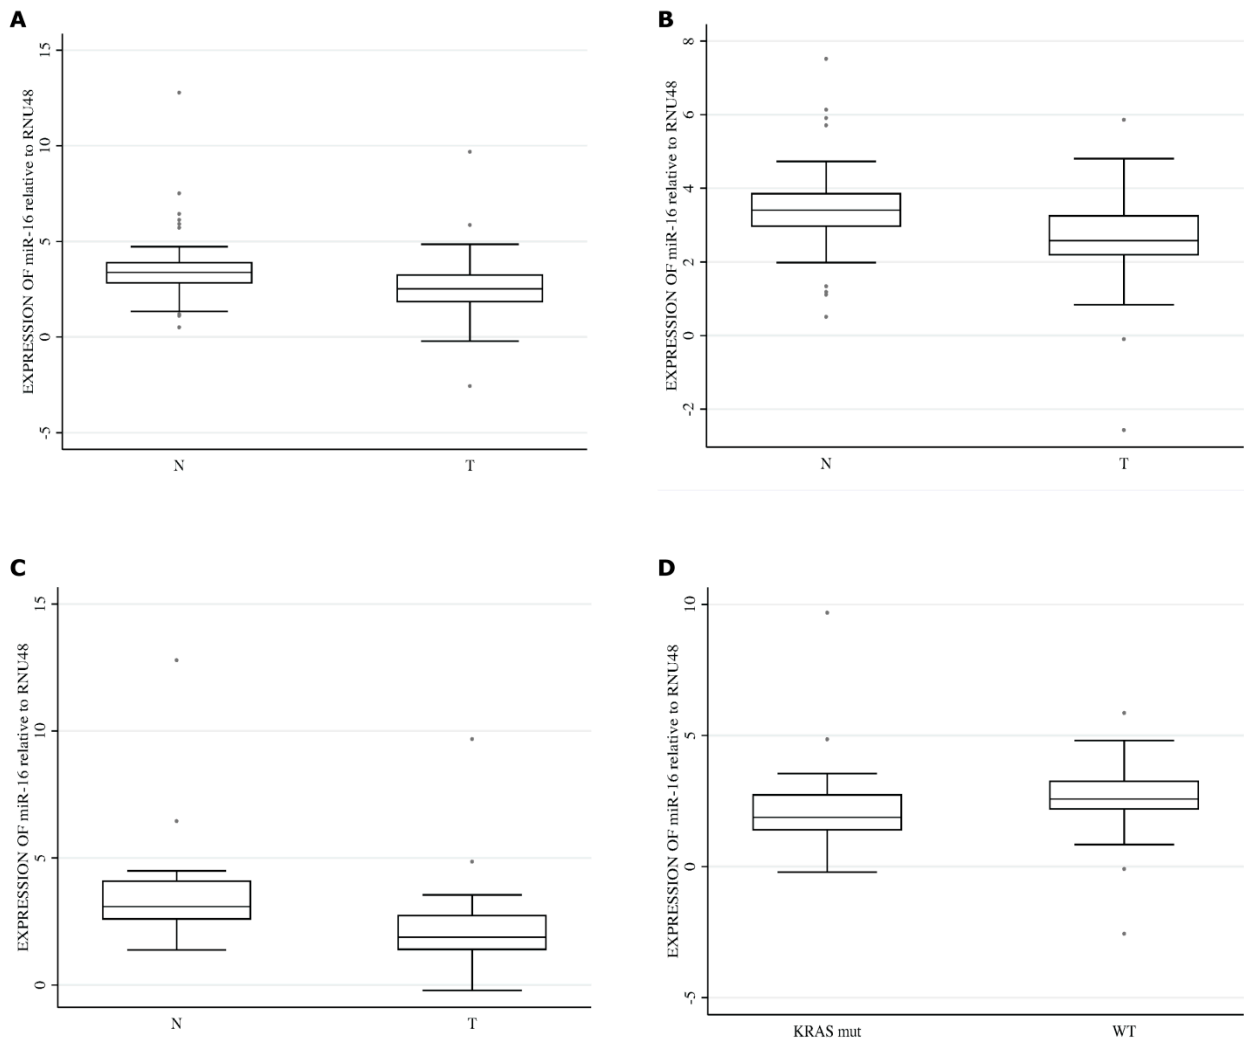

**Figure S2 MiR-16 is downregulated in NSCLC primary samples.**

(A to D) Box-plot representation of the miR-16 qRT-PCR expression data in (A) adjacent normal (N) vs tumoral (T) samples for all patients examined ( $n=92$ ), (B) in the subset of *KRAS* wild-type samples ( $n=73$ ), (C) in the subset of *KRAS* mutated samples ( $n=19$ ), (D) in the subset of tumoral samples, *KRAS* wild-type (WT) vs *KRAS* mutated (MUT) ( $n=19$  and  $n=73$ , respectively). Wilcoxon matched-pairs signed-rank test in (A) to (D). (A)  $P < 0.0001$ , (B)  $P < 0.0001$ , (C)  $P = 0.0025$ , (D)  $P = 0.0107$ . Box-plots have been presented on a log-scale.

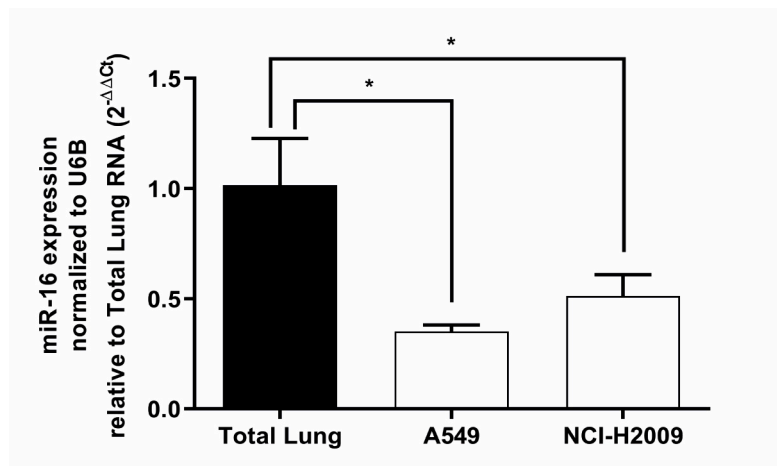

**Figure S3 MiR-16 endogenous level in *KRAS* mutated cell lines.** Quantitative Real-Time PCR expression analysis of miR-16 endogenous level in *KRAS* mutated cell lines A549 and NCI-H2009, compared to Total Lung RNA (#540019, Agilent Technologies). All data represent means  $\pm$  SD. \*  $P < 0.05$ . One-way ANOVA.

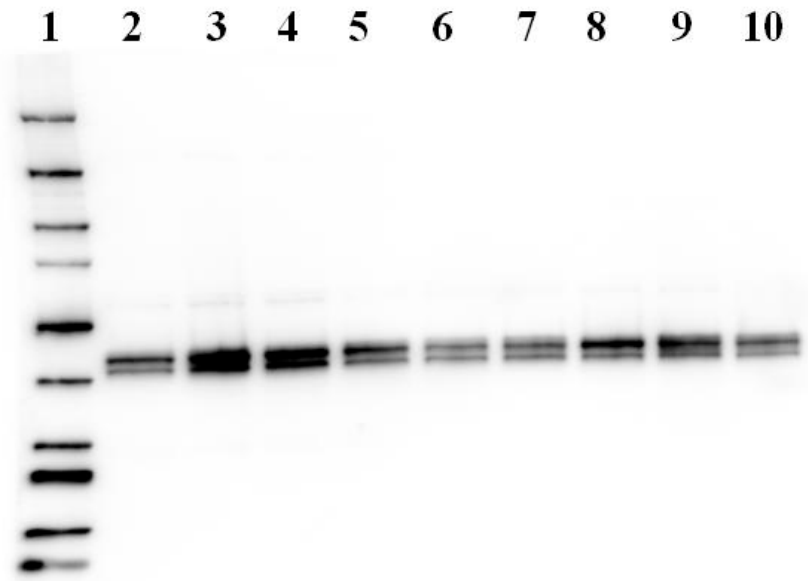

**Figure S4 Uncropped western blotting for MAPK3 bands reported in Figure 1B in A549 cells.** Lines 5 and 7 refer to A549 cells transfected with scrambled or miR-16 at the conditions reported in Fig. 1B, respectively.

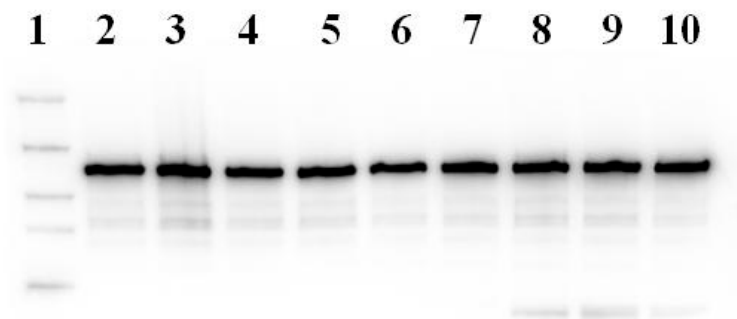

**Figure S5 Uncropped western blotting for Vinculin bands reported in Figure 1B in A549 cells.** Lines 5 and 7 refer to A549 cells transfected with scrambled or miR-16 at the conditions reported in Fig. 1B, respectively.

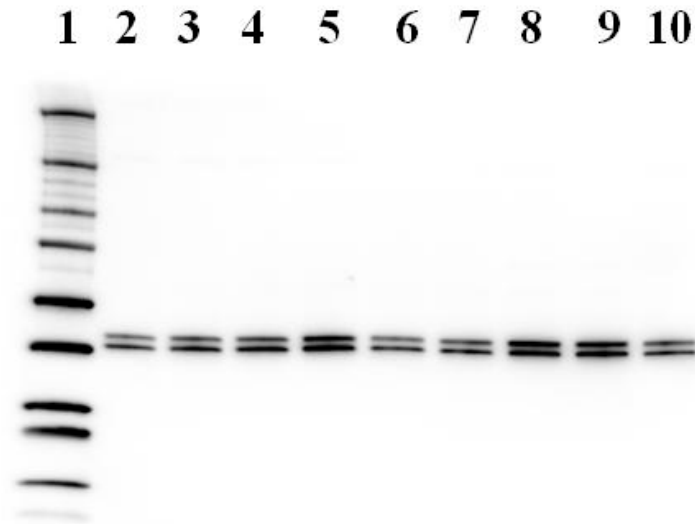

**Figure S6 Uncropped western blotting for MAPK3 bands reported in Figure 1B in NCI-H2009 cells.**

Lines 5 and 7 refer to NCI-H2009 cells transfected with scrambled or miR-16 at the conditions reported in Fig. 1B, respectively.

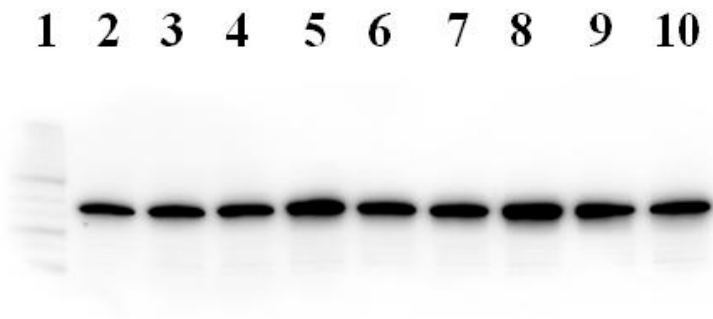

**Figure S7 Uncropped western blotting for Vinculin bands reported in Figure 1B in NCI-H2009 cells.**

Lines 5 and 7 refer to NCI-H2009 cells transfected with scrambled or miR-16 at the conditions reported in Fig. 1B, respectively.



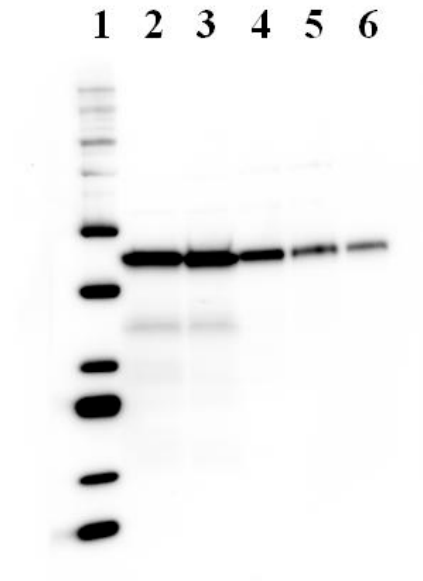

**Figure S8 Uncropped western blotting for MAP2K1 bands reported in Figure 1D in A549 cells.** Lines 4 and 6 refer to A549 cells transfected with scrambled or miR-16 at the conditions reported in Fig. 1D, respectively.

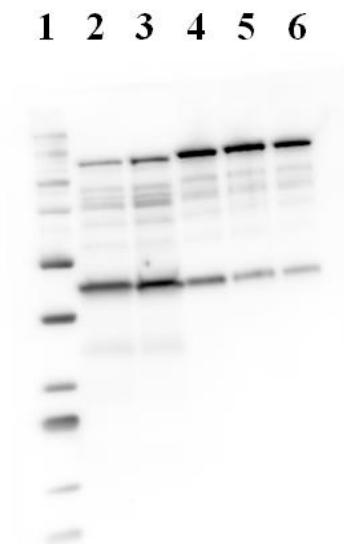

**Figure S9 Uncropped western blotting for Vinculin bands reported in Figure 1D in A549 cells.** Lines 4 and 6 refer to A549 cells transfected with scrambled or miR-16 at the conditions reported in Fig. 1D, respectively.

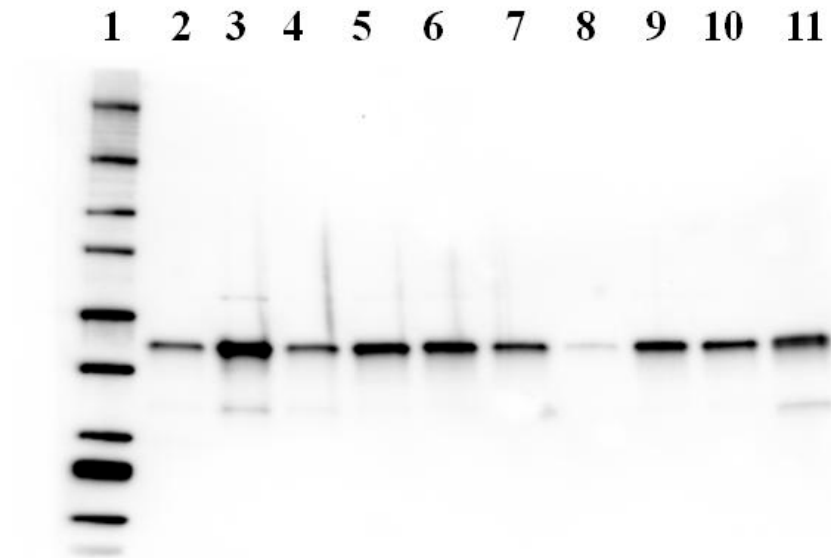

**Figure S10 Uncropped western blotting for MAP2K1 bands reported in Figure 1D in NCI-H2009 cells.**

Lines 6 and 8 refer to NCI-H2009 cells transfected with scrambled or miR-16 at the conditions reported in Fig. 1D, respectively.

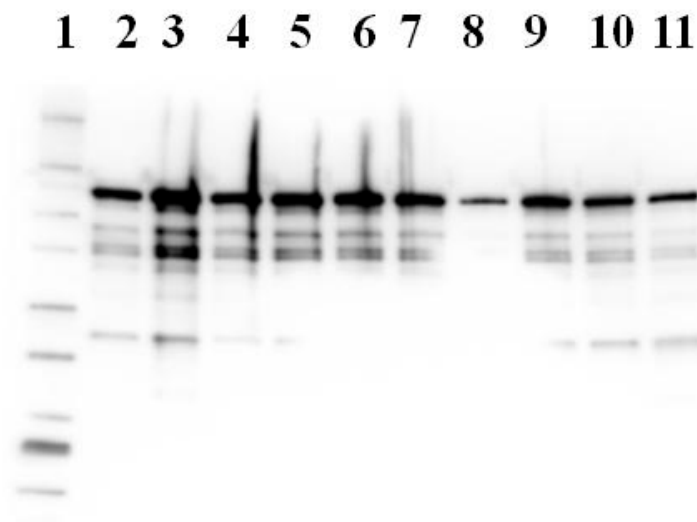

**Figure S11 Uncropped western blotting for Vinculin bands reported in Figure 1D in NCI-H2009 cells.**

Lines 6 and 8 refer to NCI-H2009 cells transfected with scrambled or miR-16 at the conditions reported in Fig. 1D, respectively.

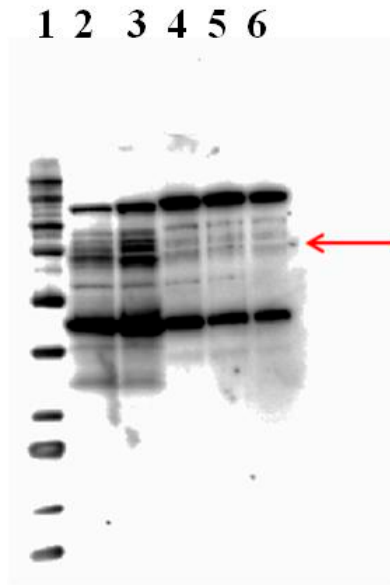

**Figure S12 Uncropped western blotting for c-RAF bands reported in Figure 1E in A549 cells.** Lines 4 and 6 refer to A549 cells transfected with scrambled or miR-16 at the conditions reported in Fig. 1E, respectively. The red arrow indicates the bands corresponding to c-RAF.

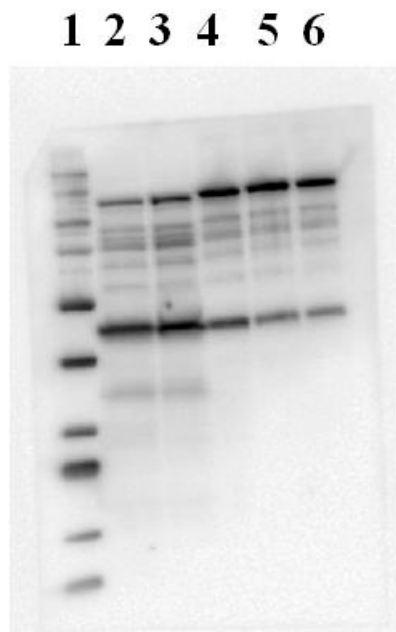

**Figure S13 Uncropped western blotting for Vinculin bands reported in Figure 1E in A549 cells.** Lines 4 and 6 refer to A549 cells transfected with scrambled or miR-16 at the conditions reported in Fig. 1E, respectively. The red arrow indicates the bands corresponding to Vinculin.

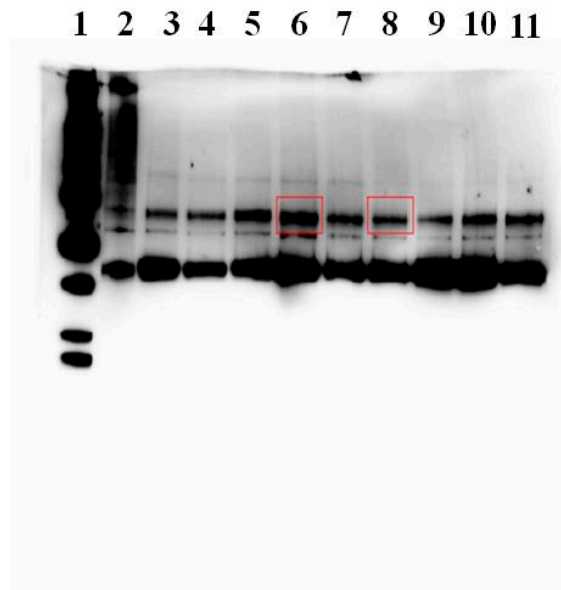

**Figure S14 Uncropped western blotting for c-RAF bands reported in Figure 1E in NCI-H2009 cells.**  
 Bands within red rectangles refer to NCI-H2009 cells transfected with scrambled (left) or miR-16 (right) at the conditions reported in Fig. 1E, respectively.

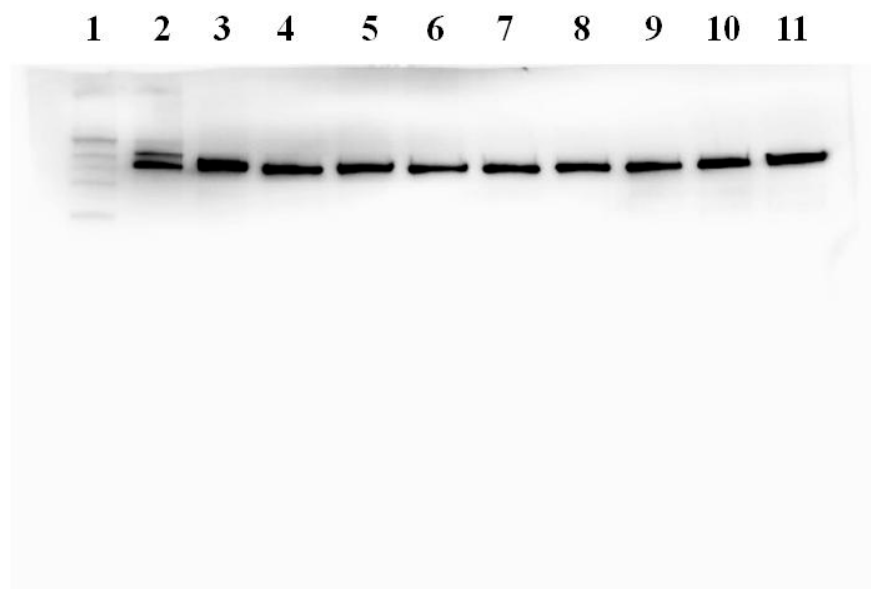

**Figure S15 Uncropped western blotting for Vinculin bands reported in Figure 1E in NCI-H2009 cells.**  
 Lines 6 and 8 refer to NCI-H2009 cells transfected with scrambled or miR-16 at the conditions reported in Fig. 1E, respectively.

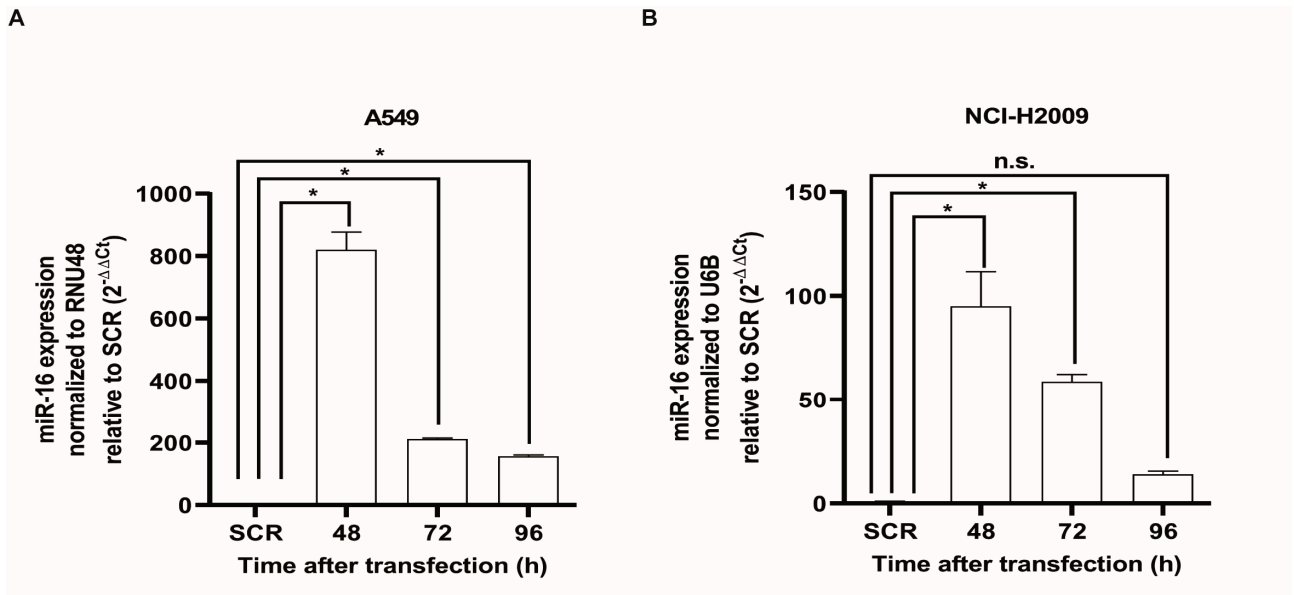

**Figure S16 MiR-16 endogenous level in *KRAS* mutated cell lines.** (A to B) Quantitative Real-Time PCR expression analysis of miR-16 levels 48-72-96 h after transfection of A549 (A) and NCI-H2009 (B) cells, compared to scrambled (SCR). All data represent means  $\pm$  SD. \*  $P < 0.05$ . One-way ANOVA.

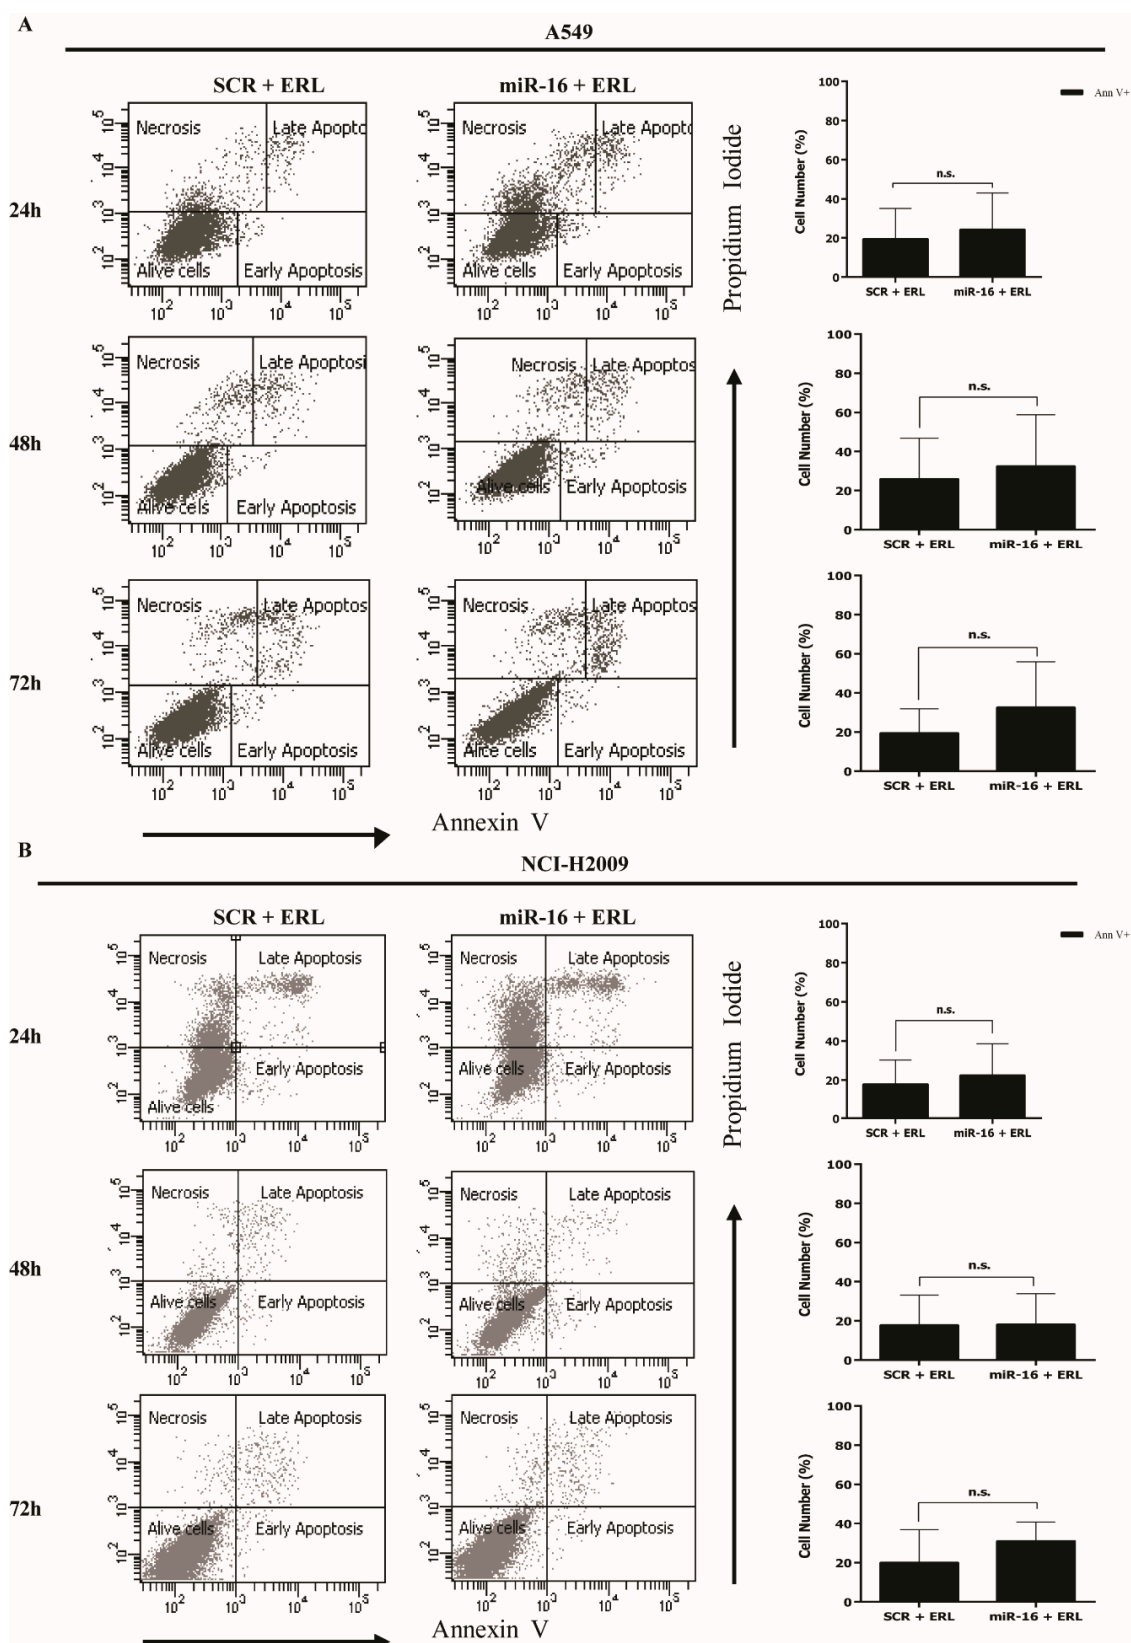

**Figure S17 Cytofluorimetric evaluation of erlotinib-induced apoptosis.** (A and B) Representative cytofluorimetric dot plots of apoptotic A549 (A) and NCI-H2009 (B) cells following PI (Propidium Iodide) and Annexin V-FITC co-staining, from one of the three experiments done. The fraction of Annexin V

positive apoptotic cells (Ann V+) was quantified as % of total cells. The average percentage resulting from three different experiments was presented in the histograms on the right, and the Ann V+ fraction was calculated as sum of early and late apoptosis percentages. All data represent means  $\pm$  SD. n.s.= not significant. Multiple *t* test, corrected for multiple comparison using the Holm-Sidak method was used.

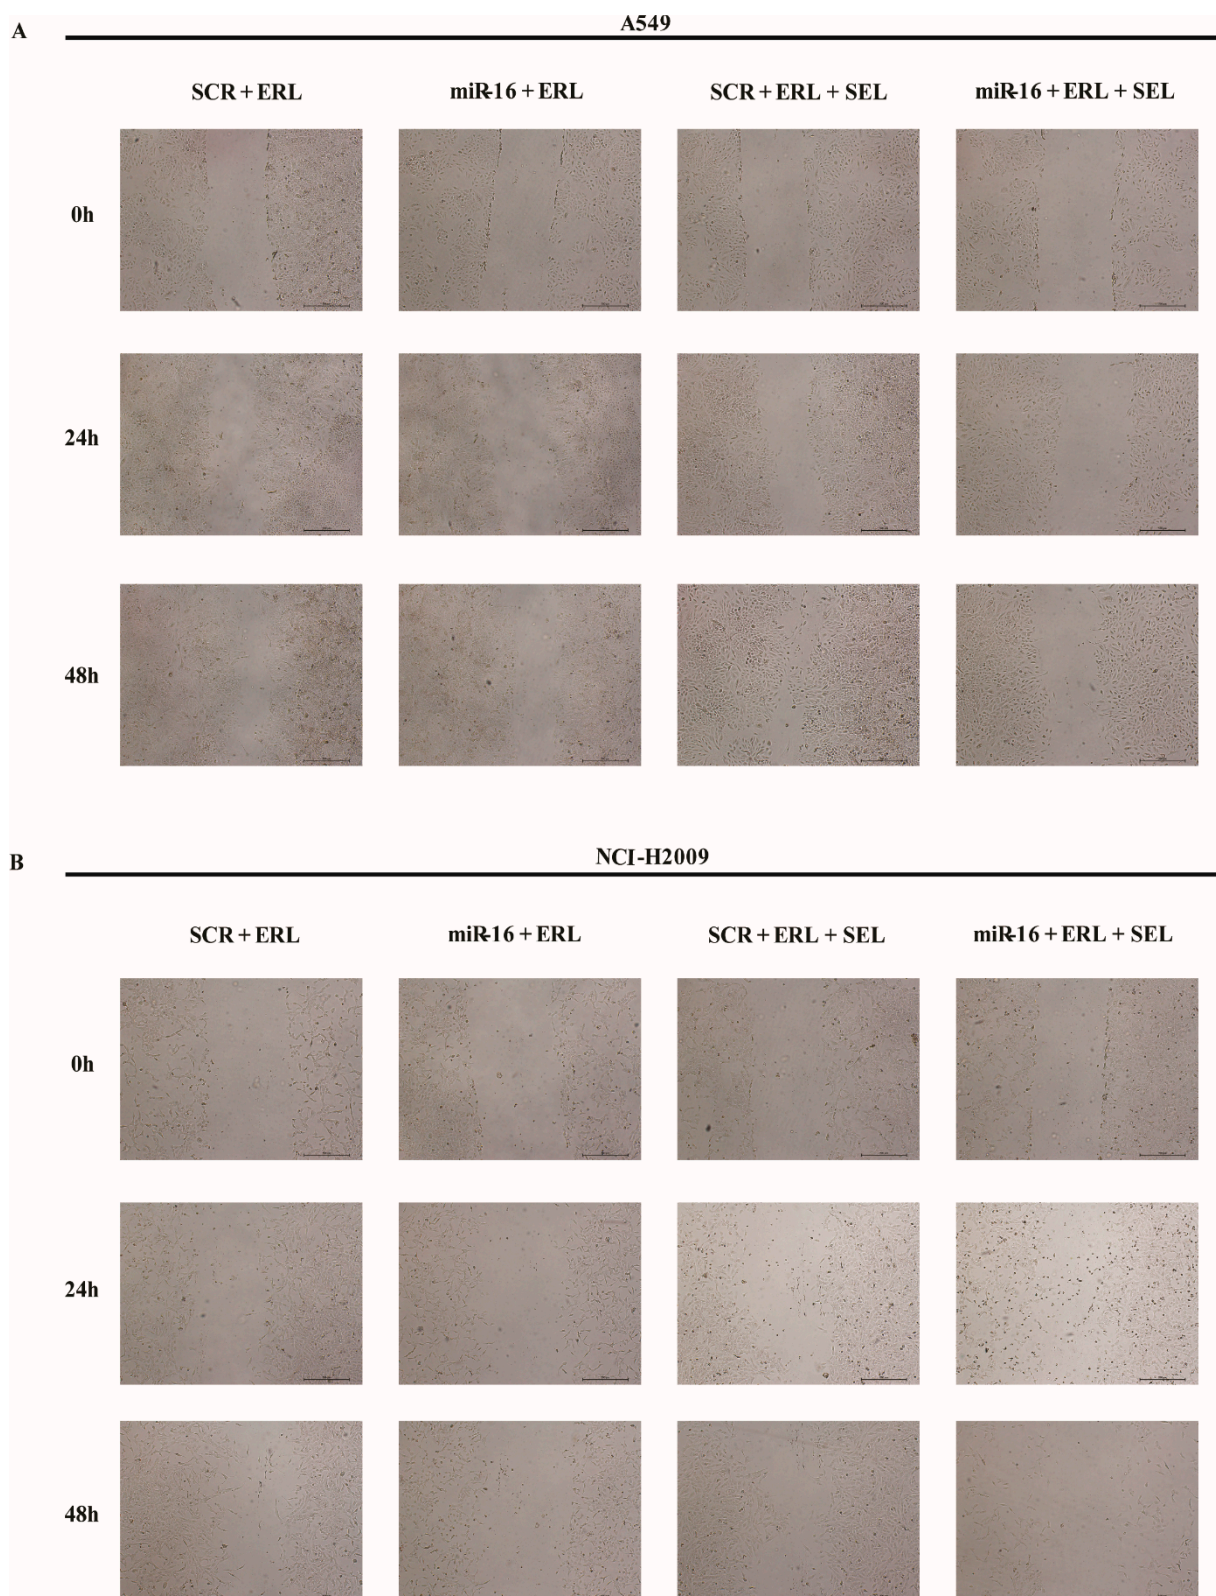

**Figure S18 Cell culture wound healing assay. (A and B)** Wounds were generated after cell transfection and drug exposure and cell migration was evaluated during 48h. Representative snapshots at 0, 24 and 48 h are shown and scale bars (500  $\mu$ m) are added for scratch width measurement.
